# Supplementary material for: Multifunctional Prussian blue nanozymes alleviate atherosclerosis through inhibiting the inflammation feedback loop
Source: Royal Society of Chemistry journal article supplement (doi:10.1039/d4tb01926a), 2024-12-04
Supplement: d4tb01926a1.pdf [file d4tb01926a1.pdf]

## Supporting Information

1

2 *Maochang Xu*<sup>a#</sup>, *Dan Ran*<sup>b#</sup>, *Jian Hu*<sup>c, d#</sup>, *Jingying Mao*<sup>c</sup>, *Dehui Qiao*<sup>c</sup>, *Zongquan*  
3 *Zhang*<sup>a</sup>, *Xiaoya Liang*<sup>a</sup>, *Li Zhang*<sup>e</sup>, *Yu Nie*<sup>f</sup>, *Hong Yang*<sup>g</sup>, *Xiangyu Zhou*<sup>c, h\*</sup>, *Chunhong*  
4 *Li*<sup>a, h\*</sup>

5 <sup>a</sup> Department of Pharmaceutical Sciences, School of Pharmacy, Southwest Medical  
6 University, Luzhou, Sichuan, 646000, China.

7 <sup>b</sup> Department of Cardiovascular Medicine, Pengzhou People's Hospital, Chengdu,  
8 Sichuan, 611930, China.

9 <sup>c</sup> Department of Thyroid Surgery, the Affiliated Hospital of Southwest Medical  
10 University, Luzhou, Sichuan, 646000, China.

11 <sup>d</sup> Department of General Surgery, Suining First People's Hospital, Suining, Sichuan,  
12 629000, China.

13 <sup>e</sup> National Engineering Research Center for Biomaterials, Sichuan University, Chengdu,  
14 Sichuan, 610041, China;

15 <sup>f</sup> Department of Pediatrics, The Affiliated Hospital of Southwest Medical University,  
16 Luzhou, Sichuan, 646000, China;

17 <sup>g</sup> Basic Medicine Research Innovation Center for Cardiometabolic Disease, Ministry of  
18 Education, Southwest Medical University, Luzhou, Sichuan, 646000, China.

19

20 # These authors contributed equally to this manuscript.

21 \*Corresponding author: Xiangyu Zhou (Xiangyuzhou971@vip.126.com); Chunhong Li  
22 (lispringhong@126.com).

23

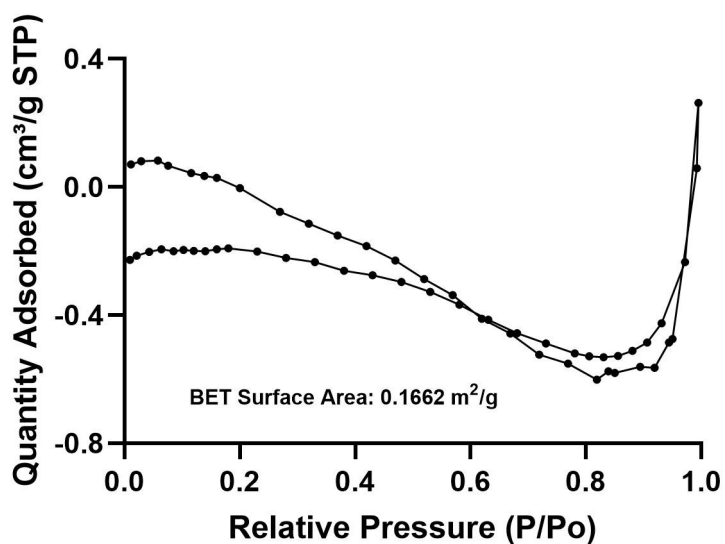

24

25 Fig S1. The BET test result of BSA@PB/Cur.

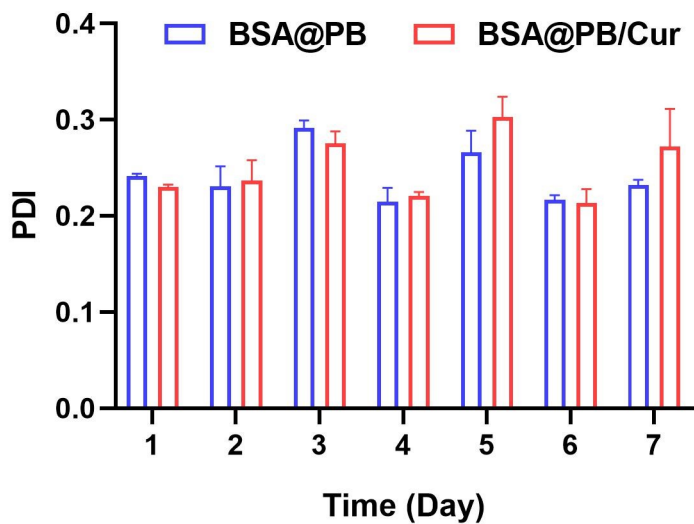

26

27 Fig S2. Stability of BSA@PB and BSA@PB/Cur during storage. Data are expressed as

28 mean  $\pm$  SD (n = 3).

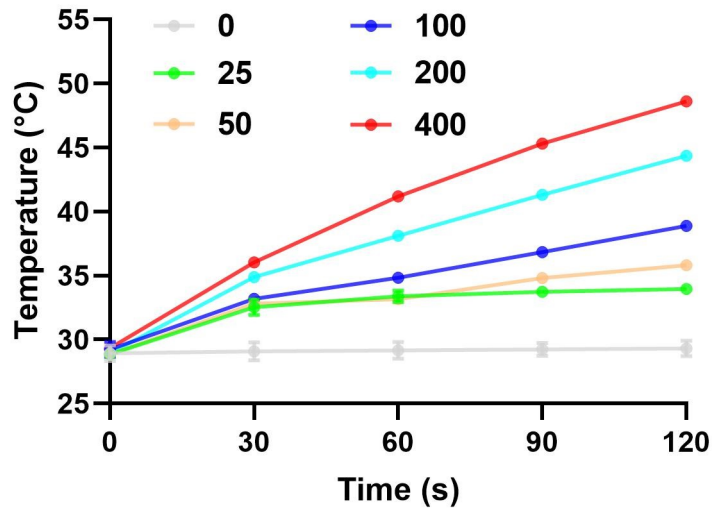

29

30 Fig S3. Temperature profiles of different concentrations of BSA@PB/Cur. Data are  
 31 expressed as mean  $\pm$  SD (n = 3).

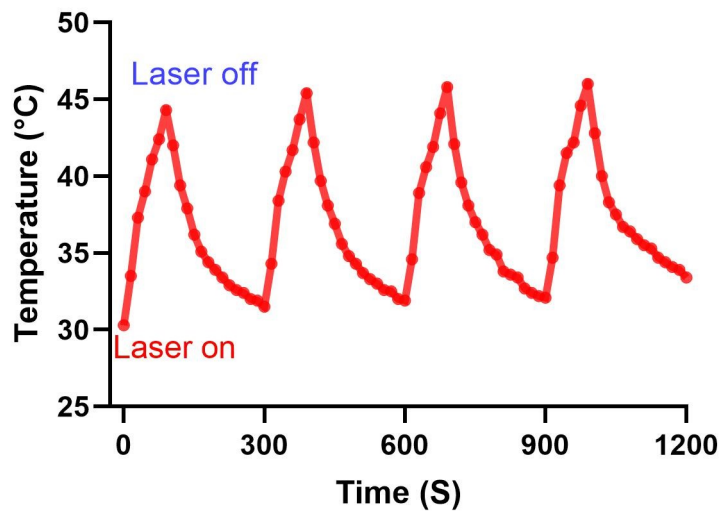

32

33 Fig S4. Temperature change of BSA@PB/Cur (200  $\mu\text{g}/\text{mL}$ ) under 808 nm laser  
 34 irradiation at a power density of 1  $\text{W}/\text{cm}^2$  for 4 cycles.

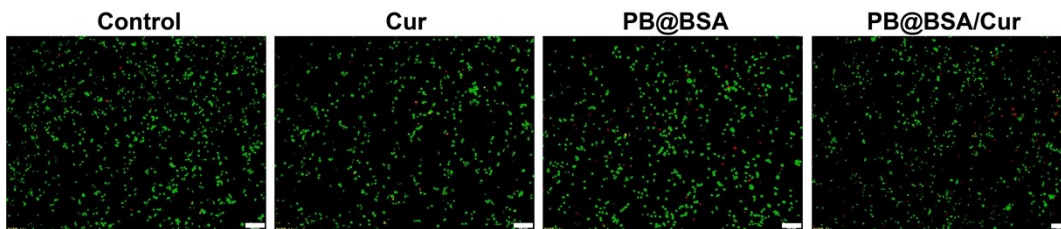

35

36 Fig S5. Live/dead double staining of Cur, BSA@PB and BSA@PB/Cur after incubation  
 37 of macrophages. Scale bar = 100  $\mu$ m.

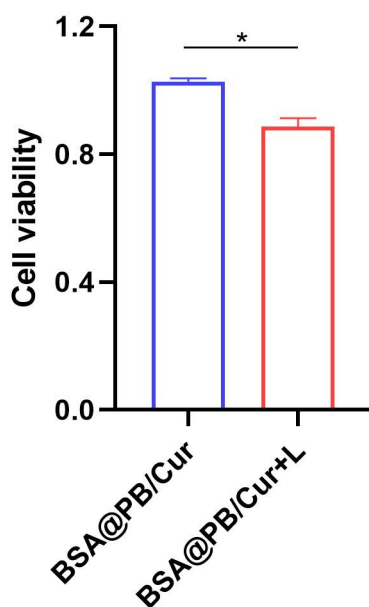

38

39 Fig S6. Toxicity of BSA@PB/Cur (200  $\mu$ g/mL) to macrophages under light and no light.

40 Data are expressed as mean  $\pm$  SD (n = 3). \*P < 0.05, \*\*P < 0.01, \*\*\*P < 0.001, \*\*\*\*P <

41 0.0001.

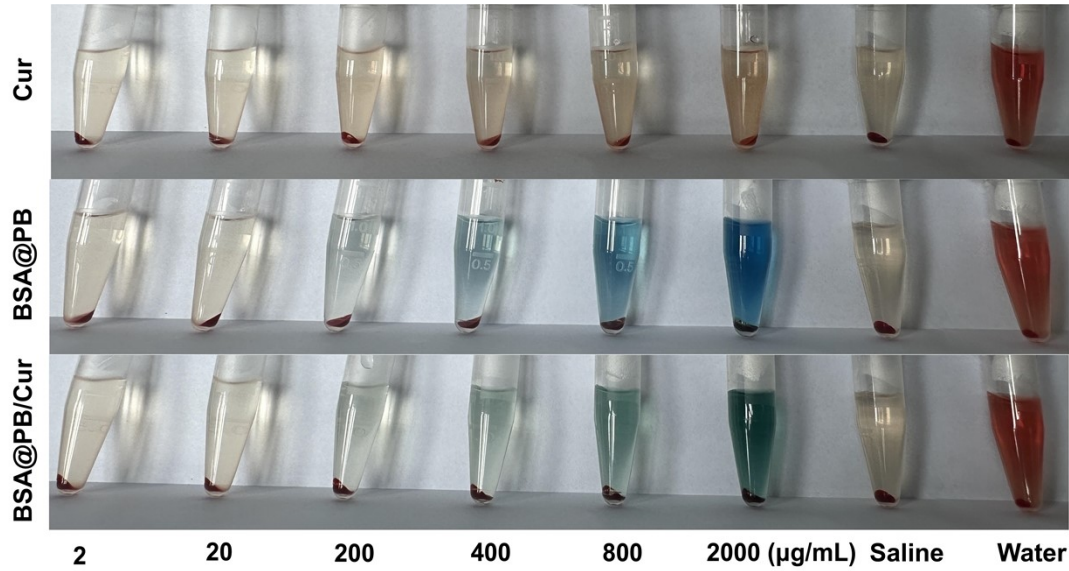

42

43 Fig S7. Haemolysis of Cur, BSA@PB and BSA@PB/Cur cells at different concentrations.

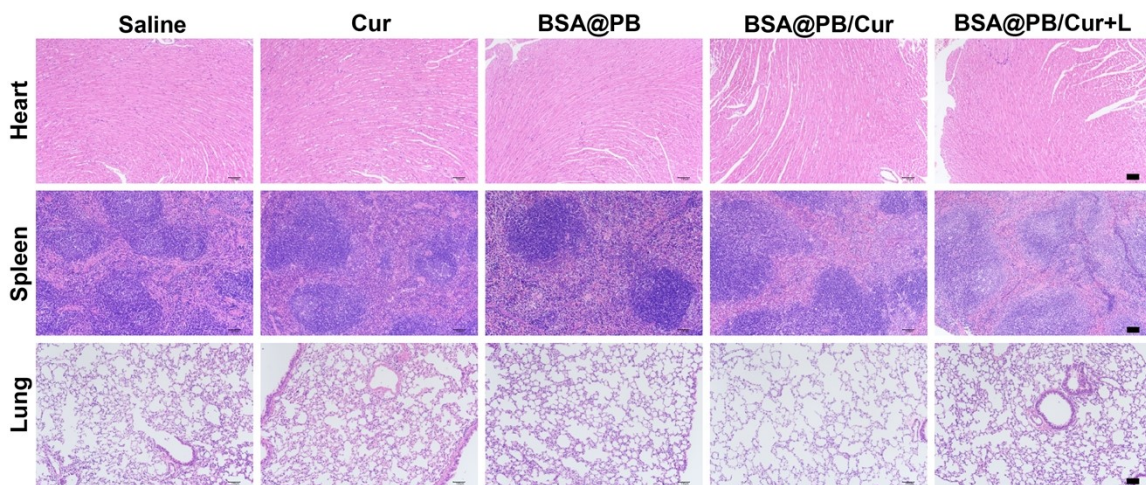

44

45 Fig S8. Representative H&E staining images of Heart, Spleen and Lung of ApoE<sup>-/-</sup> mice

46 after different treatments. Scale bar = 100 µm.

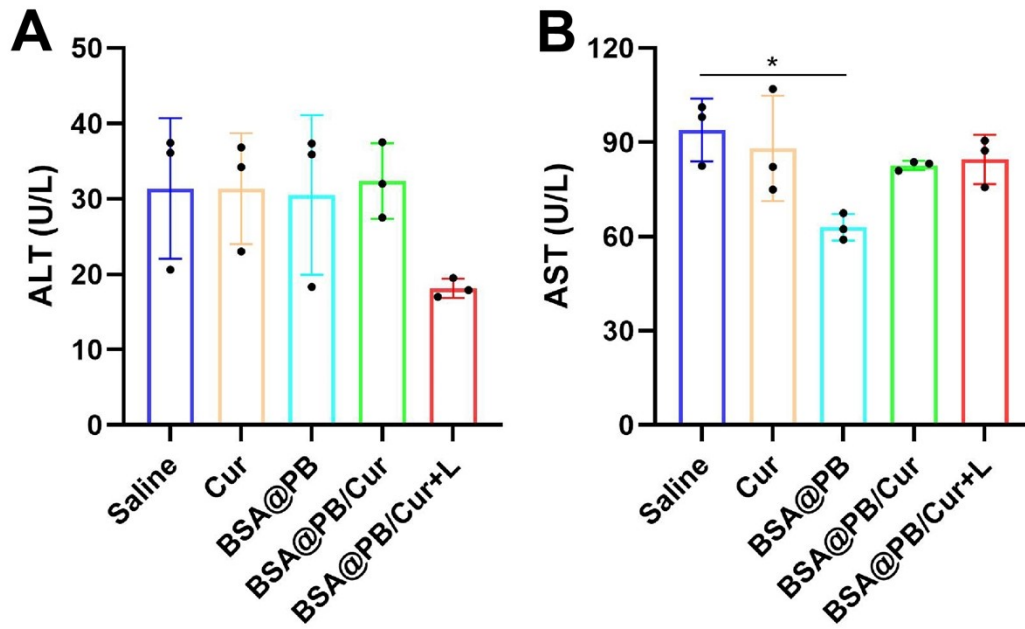

47

48 Fig S9. Serum levels of (A) ALT and (B) AST in ApoE<sup>-/-</sup> mice after treatment with  
 49 different formulations. Data are expressed as mean ± SD (n = 3). \*P < 0.05, \*\*P < 0.01,  
 50 \*\*\*P < 0.001, \*\*\*\*P < 0.0001.

51

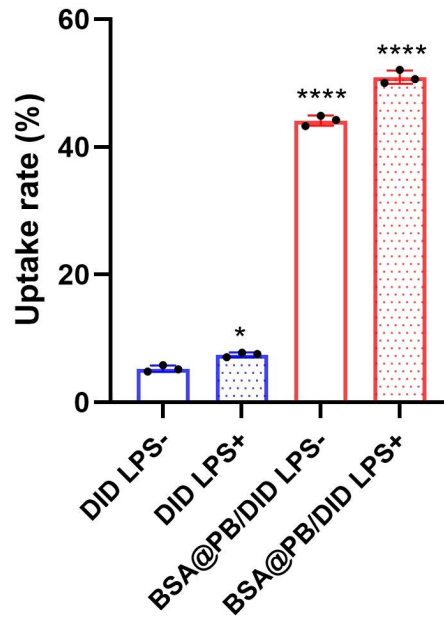

52

53 Fig S10. Cellular uptake ratio of DID and BSA@PB/DID by LPS-activated or non-  
 54 activated macrophages. Data are expressed as mean  $\pm$  SD (n = 3). \*P < 0.05, \*\*P < 0.01,  
 55 \*\*\*P < 0.001, \*\*\*\*P < 0.0001.

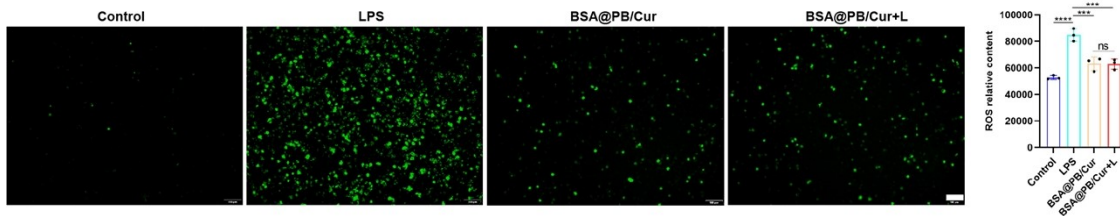

56

57 Fig S11. Fluorescence images of LPS activated macrophages incubated with DCFH-DA  
 58 after treatment with different formulations. Scale bar = 100  $\mu$ m. \*P < 0.05, \*\*P < 0.01,  
 59 \*\*\*P < 0.001, \*\*\*\*P < 0.0001.

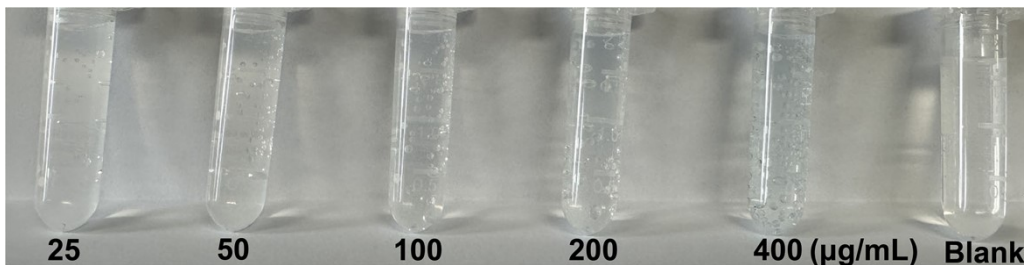

60

61 Fig S12. Bubbles generation after mixing different concentrations of BSA@PB/Cur with

62 H<sub>2</sub>O<sub>2</sub>.

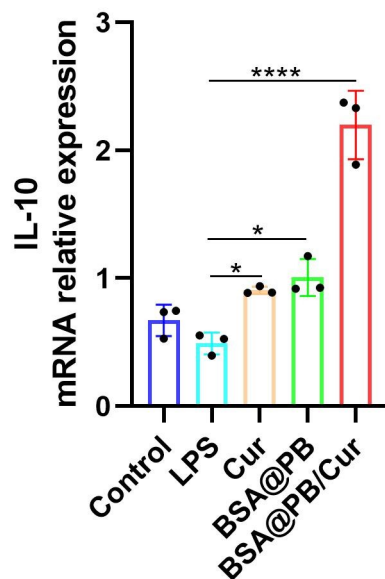

63

64 Fig S13. The mRNA level of interleukin 10 (IL-10) in LPS-activated macrophages  
65 treated with different preparations (200 µg/mL). Data are expressed as mean ± SD (n = 3).

66 \*P < 0.05, \*\*P < 0.01, \*\*\*P < 0.001, \*\*\*\*P < 0.0001.



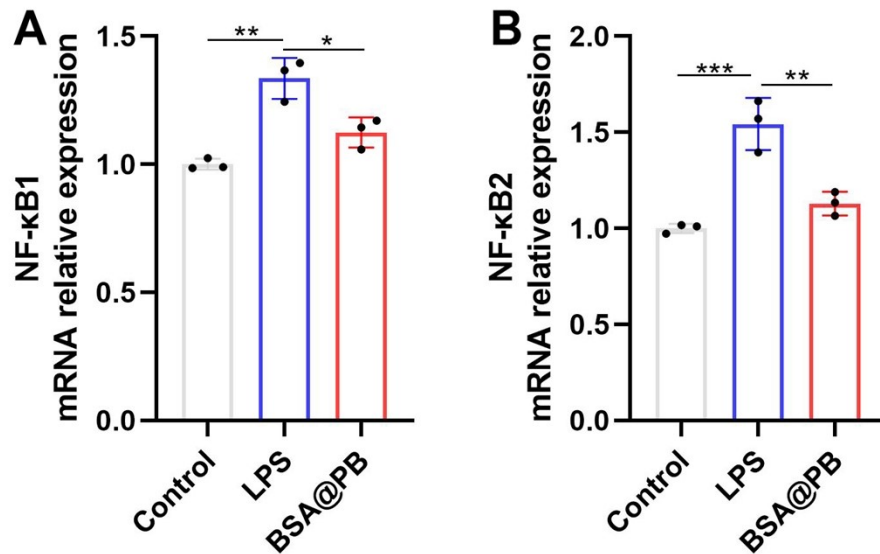

67

68 Fig S14. PCR to detect (A) NF-κB1 and (B) NF-κB2 relative mRNA expression in LPS-  
 69 activated macrophages treated with BSA@PB (200 μg/mL). Data are expressed as mean  
 70 ± SD (n = 3). \*P < 0.05, \*\*P < 0.01, \*\*\*P < 0.001, \*\*\*\*P < 0.0001.

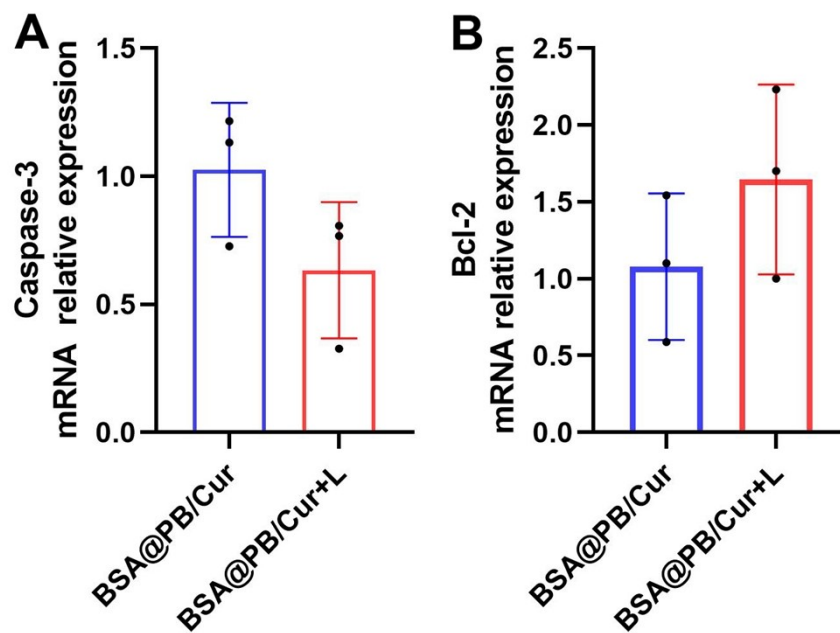

71

72 Fig S15. (A) Caspase-3 and (B) Bcl-2 relative mRNA expression after BSA@PB/Cur  
73 without or with 808 nm laser irradiation for 2 min ( $1 \text{ W/cm}^2$ ). Data are expressed as mean  
74  $\pm$  SD ( $n = 3$ ).

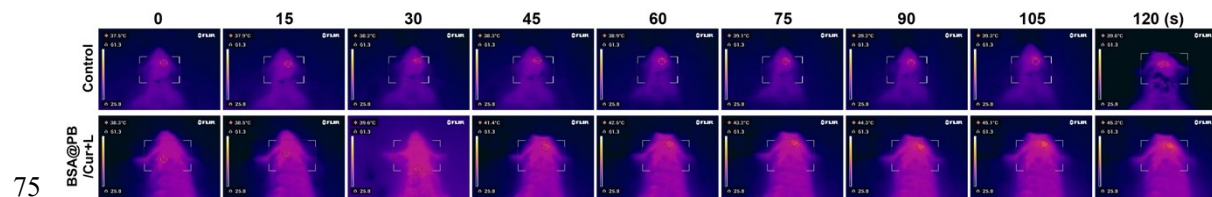

76 Fig S16. Photothermal images of the aortic site under 808 nm irradiation after injection of  
77 different formulations ( $1 \text{ W/cm}^2$ , 2 min).

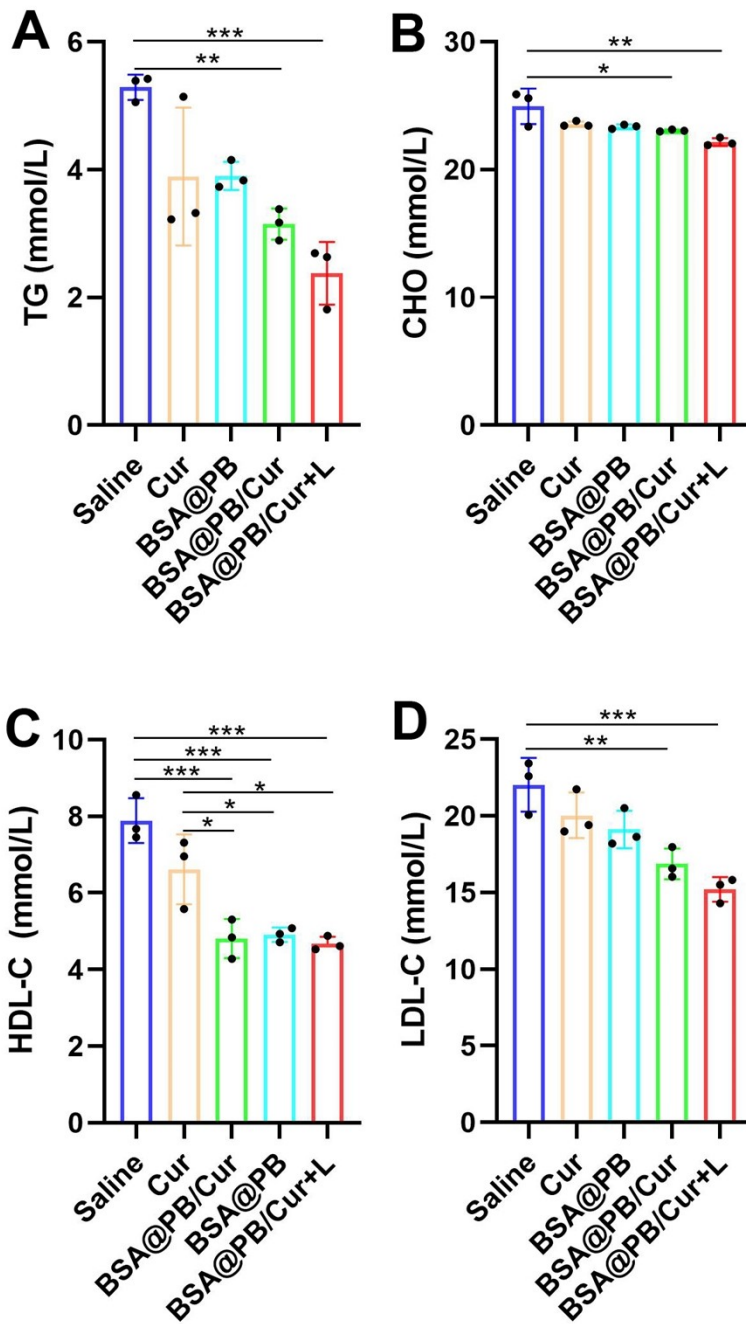

78

79 Fig S17. Serum expression levels of (A) triglycerides (TG), (B) total cholesterol (CHO),  
 80 (C) low-density lipoprotein (LDL-C) and (D) high-density lipoprotein (HDL-C) after  
 81 treatment with different formulations. Data are expressed as mean  $\pm$  SD (n = 3). \*P <

82 0.05, \*\*P < 0.01, \*\*\*P < 0.001, \*\*\*\*P < 0.0001.

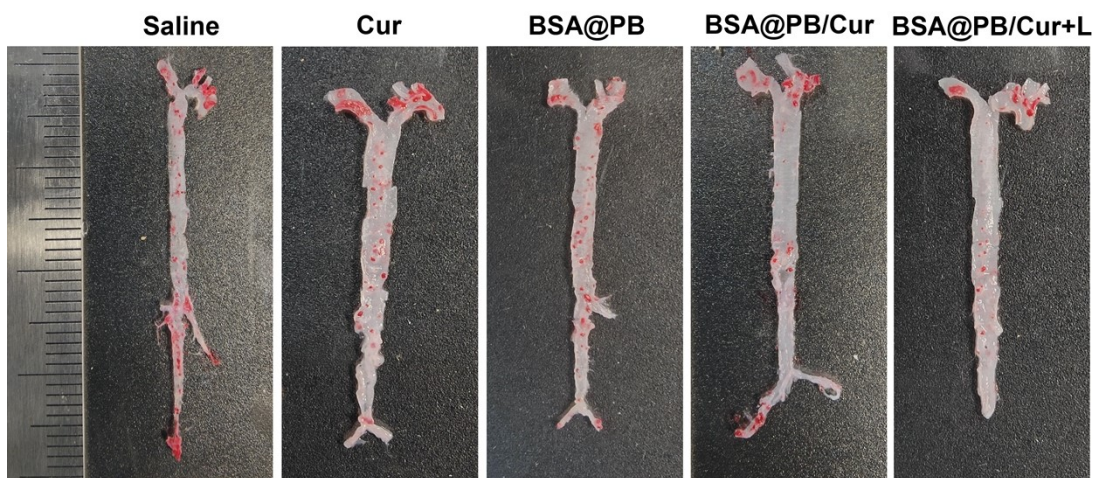

83

84 Fig S18. Representative images of whole aorta oil red O staining in atherosclerotic mice

85 after treatment with different formulations.

87

88 Table S1. Primer sequence for reverse transcription-quantitative PCR.

| Gene            | Forward Primer (5' to 3')   | Reverse Primer (5' to 3')   |
|-----------------|-----------------------------|-----------------------------|
| NF- $\kappa$ B1 | ATGGCAGACGATGATCCC<br>TAC   | TGTTGACAGTGGTATTTCT<br>GGTG |
| NF- $\kappa$ B2 | GGCCGGAAGACCTATCCT<br>ACT   | CTACAGACACAGCGCACAC<br>T    |
| TNF- $\alpha$   | CTGAACTTCGGGGTGATCG<br>G    | GGCTTGTCACTCGAATTTT<br>GAGA |
| IL-1 $\beta$    | CTGTGACTCATGGGATGAT<br>GATG | CGGAGCCTGTAGTGCAGTT<br>G    |
| IL-10           | GCTCTTACTGACTGGCATG<br>AG   | CGCAGCTCTAGGAGCATGT<br>G    |
| ABCA1           | AACAACCCCTGCTTCCGTT<br>AT   | GGCGAGACACGATGGACTT<br>G    |
| ABCG1           | TCCTACTCTGTACCCGAGG<br>G    | CGGGGCATTCCATTGATAA<br>GG   |
| Caspase-3       | CTCGCTCTGGTACGGATGTG        | TCCATAAATGACCCCTTCAT<br>CA  |
| Bcl-2           | GAGAGCGTCAACAGGGAGA<br>TG   | CCAGCCTCCGTTATCCTGGA        |
| GAPDHF          | AGGTCGGTGTGAACGGAT<br>TTG   | GGGGTCGTTGATGGCAACA         |

89

90 Table S2. XPS of BSA@PB/Cur surfaces (elemental composition and content).

| Name | Peak BE | FWHM (eV) | Area (P)<br>CPS.eV | Atomic (%) |
|------|---------|-----------|--------------------|------------|
|------|---------|-----------|--------------------|------------|

---

|      |        |      |          |       |
|------|--------|------|----------|-------|
| Fe2p | 709.04 | 0.82 | 403.3    | 0.17  |
| O1s  | 531.99 | 2.33 | 12595.97 | 17.42 |
| N1s  | 400.09 | 1.65 | 5974.76  | 13.53 |
| K2p  | 293.42 | 1.36 | 3142.5   | 2.47  |
| C1s  | 285    | 2.34 | 18143.16 | 66.41 |

---

91
